# Supplementary material for: p38 MAPK signaling in M1 macrophages results in selective elimination of M2 macrophages by MEK inhibition
Source: PubMed Central journal article supplement — J Immunother Cancer. 2021 Jul 20;9(7):e002319. doi: 10.1136/jitc-2020-002319 (PMC8292803; doi:10.1136/jitc-2020-002319), 2021-07-20
Supplement: jitc-2020-002319supp004.pdf [file jitc-2020-002319supp004.pdf]

**Baumann et al.: P38 MAPK signaling in M1 macrophages results in selective elimination of M2 macrophages by MEK inhibition**

**Graphical Abstract**

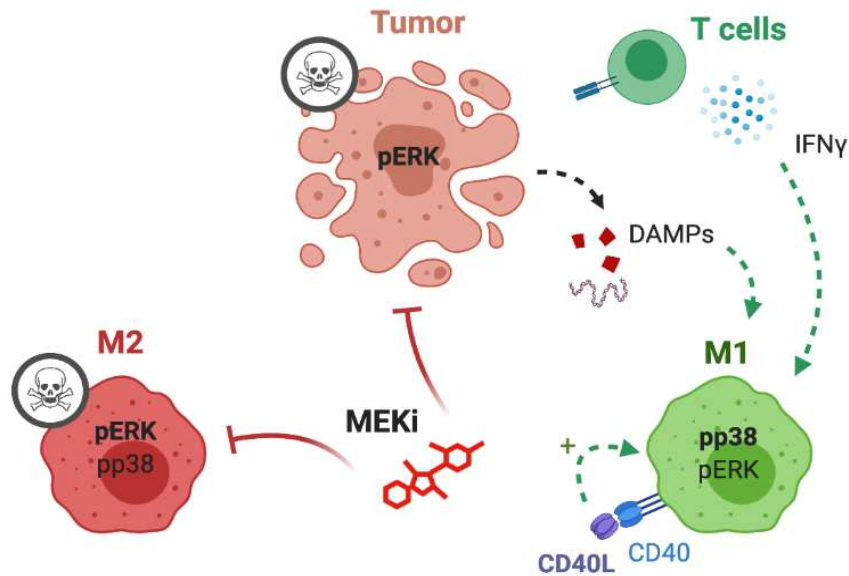

created with BioRender.com

**Highlights:**

- MEK inhibitors (MEKi) eliminate M2 macrophages with similar efficacy as Kras-driven PDAC tumor cells
- M1 macrophages are resistant to MEKi-induced killing
- p38 MAPK signaling acts as a compensatory survival pathway for M1 macrophages
