# Supplementary figures and images for: p38 MAPK signaling in M1 macrophages results in selective elimination of M2 macrophages by MEK inhibition
Source: PubMed Central journal article supplement — J Immunother Cancer. 2021 Jul 20;9(7):e002319. doi: 10.1136/jitc-2020-002319 (PMC8292803; doi:10.1136/jitc-2020-002319), 2021-07-20

## Supplemental Figure 2: Gating scheme human macrophages

A

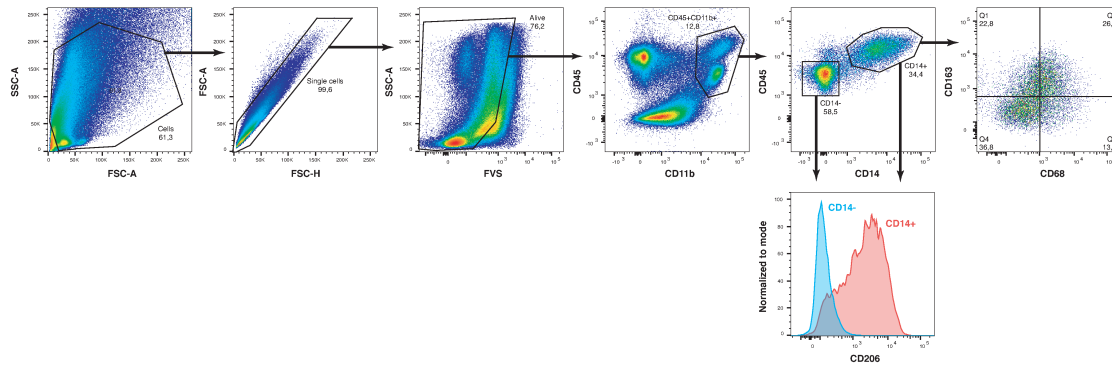

B

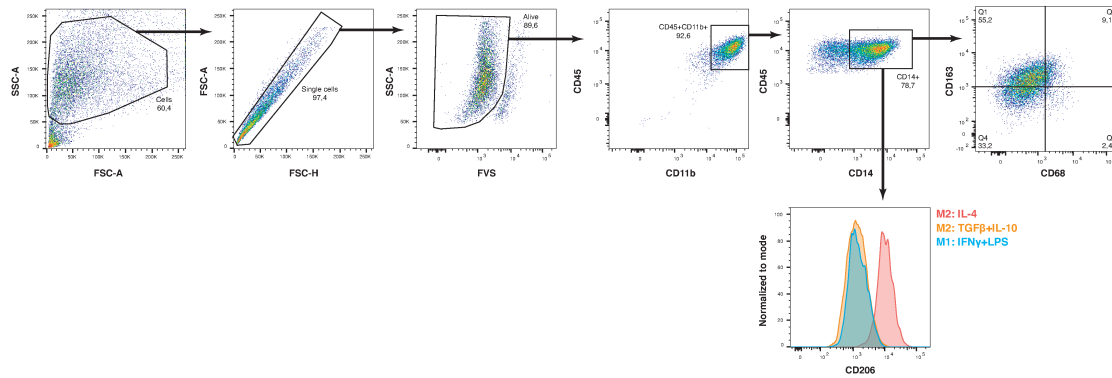

Supplement: jitc-2020-002319supp003.pdf [file jitc-2020-002319supp003.pdf]
